# Supplementary material
Source: publisher figshare collection journal article supplement (https://acs.figshare.com/ndownloader/files/20179559)
Supplement: Supplementary file 1 [file 20179559]

## Supporting Information

# Identity of the Most and Least Active Sites for Activation of the Pathways for CO<sub>2</sub> Formation from the Electro-oxidation of Methanol and Ethanol on Platinum

Manuel J. S. Farias<sup>\*,†</sup>, William Cheuquepán<sup>‡,§</sup>, Auro A. Tanaka<sup>†</sup>, and Juan M. Feliu<sup>‡</sup>

<sup>†</sup>*Departamento de Química, Universidade Federal do Maranhão, Avenida dos Portugueses, 1966, CEP 65080-805, São Luís – Maranhão, Brazil*

<sup>‡</sup>*Instituto de Electroquímica, Universidad de Alicante, Ap. 99, E-03080, Alicante, Spain*

<sup>§</sup>*Present address: Departamento de Química, Universidad de Burgos. Pza. Misael Bañuelos, s/n, 09001 Burgos, Spain.*

\*Corresponding author: [manueljsfarias@gmail.com](mailto:manueljsfarias@gmail.com)

(Manuel J. S. Farias). Phone: +55 98 3301 8246.

## Table of Contents

|                                                                                                                                                                                               |    |
|-----------------------------------------------------------------------------------------------------------------------------------------------------------------------------------------------|----|
| 1. Partial CO Stripping.....                                                                                                                                                                  | S2 |
| 2. Reactivity of Stepped Pt Surfaces Toward Electro-oxidation of Alcohols as Monitored by Cyclic Voltammetry.....                                                                             | S2 |
| 3. Electro-oxidation of Alcohols on Stepped Pt Single Crystal Surfaces with the (110) Steps Marked with <sup>13</sup> CO <sub>ads</sub> as Monitored by <i>in situ</i> FTIR Spectroscopy..... | S3 |

## 1. Partial CO Stripping

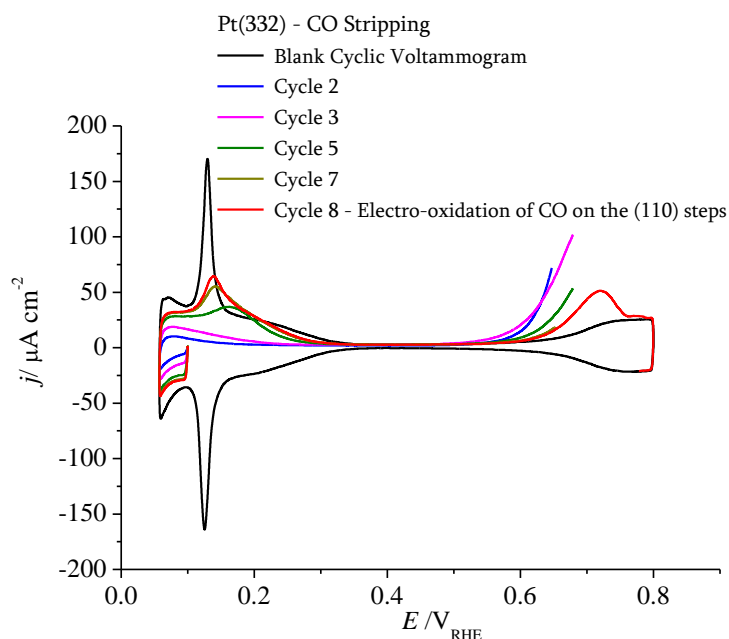

**Figure SI 1.** Successive voltammograms recorded at  $0.05 \text{ V s}^{-1}$  during the electro-oxidation of a CO adlayer on Pt(332) in  $0.1 \text{ M HClO}_4$ .

## 2. Reactivity of Stepped Pt Surfaces Toward Electro-oxidation of Alcohols as Monitored by Cyclic Voltammetry

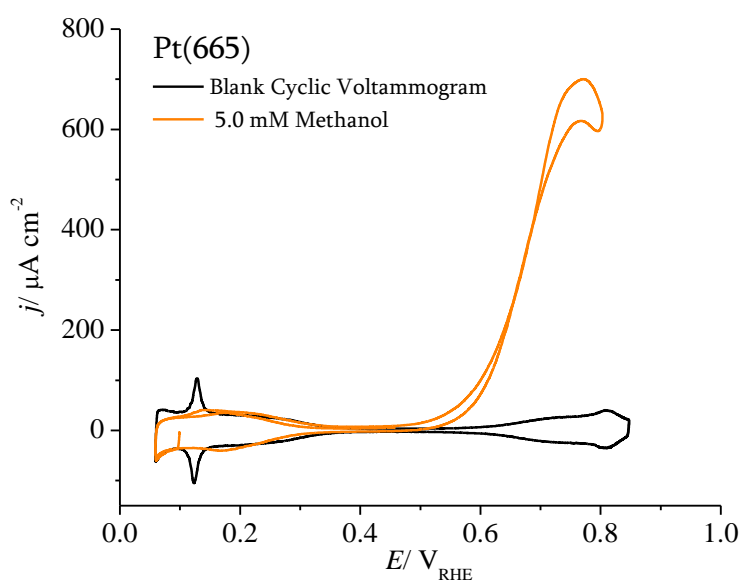

**Figure SI 2.** Electro-oxidation of  $5.0 \text{ mM}$  methanol on Pt(665) in the presence of  $0.1 \text{ M HClO}_4$ . Data recorded at  $0.05 \text{ V s}^{-1}$ .

### 3. Electro-oxidation of Alcohols on Stepped Pt Single Crystal Surfaces with the (110) Steps Marked with $^{13}\text{CO}_{\text{ads}}$ as Monitored by *in situ* FTIR Spectroscopy

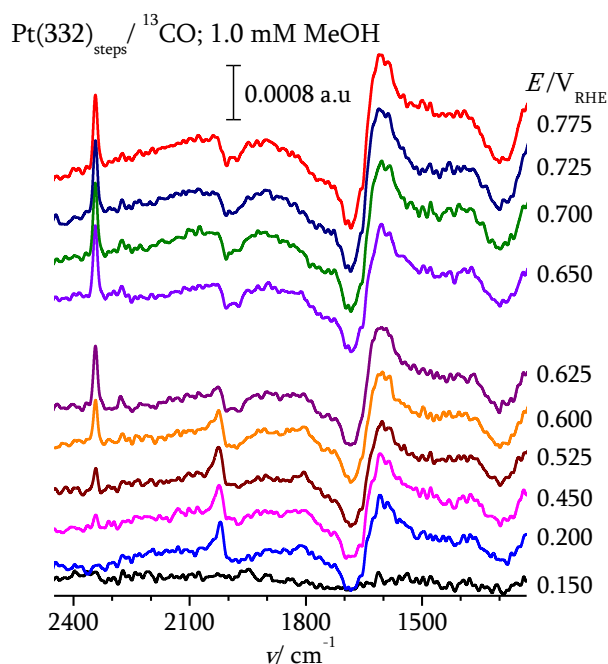

**Figure SI 3.** Spectra for the electro-oxidation of methanol (1.0 mM) on a Pt(332) stepped surface with the (110) steps previously and selectively decorated with  $^{13}\text{CO}_{\text{ads}}$ . The series of spectra (200 interferograms at resolution of  $8\text{ cm}^{-1}$ ) was acquired from 0.050 to 0.800  $V_{\text{RHE}}$ , in intervals of 25 mV (only some selected spectra are shown). The reference spectrum was acquired at 0.100  $V_{\text{RHE}}$ .
